# Supplementary material for: Mesostructuring layered materials: self-supported mesoporous layered double hydroxide nanotubes
Source: Royal Society of Chemistry journal article supplement (doi:10.1039/d1nr02477a), 2021-01-01
Supplement: d1nr02477a1.pdf [file d1nr02477a1.pdf]

## Supporting Information

### Mesostructuring layered materials: self-supported mesoporous layered double hydroxide nanotubes

*Alysson F. Morais, Dimy Nanclares, Ivan G.N. Silva, Alfredo Duarte, Fernando A. Garcia, Eric Breyngaert and Danilo Mustafa\**

#### S1. Materials and Methods

The metal precursors  $\text{Zn}(\text{NO}_3)_2 \cdot 6\text{H}_2\text{O}$  (98 mol%, Vetec) and  $\text{Al}(\text{NO}_3)_3 \cdot 9\text{H}_2\text{O}$  (98 mol%, LabSynth),  $\text{H}_3\text{BTC}$  (97 mol%, Sigma-Aldrich, powder form) and  $\text{NaOH}$  (97 mol%, Vetec, lentils) were used without further purification.  $\text{Eu}(\text{NO}_3)_3 \cdot 6\text{H}_2\text{O}$  was prepared by dissolution of  $\text{Eu}_2\text{O}_3$  (CSTARM, 99,99 mol%) in concentrated nitric acid and subsequent crystallization of  $\text{Eu}(\text{NO}_3)_3 \cdot 6\text{H}_2\text{O}$ . The triblock copolymer Pluronic® P-123 was procured from Sigma Aldrich (São Paulo, Brazil).

##### S1.1. Synthesis

Mesoporous LDH with nominal composition  $[\text{Zn}_2\text{Al}_{1-X}\text{Eu}_X(\text{OH})_6]^{+}(\text{BTC}^{3-})_{0.33} \cdot \text{pH}_2\text{O}$ , dubbed ZnAl-BTC-P123 for  $X = 0$  and ZnAlEuX-BTC-P123 for  $X = 0.5, 1, 3, 5, 10$  and 15%, were synthesized by coprecipitation of  $\text{Zn}^{2+}$ ,  $\text{Al}^{3+}$  and  $\text{Eu}^{3+}$  in alkaline solution containing BTC and Pluronic® P-123 worm-like micelles. To prepare the micelles, 200 mL of a solution containing 0.15 wt% P-123 and  $11.5 \times 10^{-3} \text{ mol.L}^{-1}$  BTC and whose pH was adjusted to pH 8 with addition of sodium hydroxide were heated to 60°C to complete dissolution of the components and subsequently cooled to room temperature. Another heat cycle to 60 °C was done to optimize the micellization. To prepare the LDHs, 10 mL of a solution containing the metal precursors  $\text{Zn}(\text{NO}_3)_2 \cdot 6\text{H}_2\text{O}$ ,  $\text{Al}(\text{NO}_3)_3 \cdot 9\text{H}_2\text{O}$  and  $\text{Eu}(\text{NO}_3)_3 \cdot 6\text{H}_2\text{O}$  in the ratio 2:1-X:X and total metal concentration of  $1 \text{ mol.L}^{-1}$  (see **Table S1**) were dosed at a rate of  $10 \text{ mL.h}^{-1}$  into the solution containing the BTC and the micelles. The pH of the synthesis solution was stated at pH 8 by a Metrohm 848 Titrino plus automatic titrator. Finished the metal solution, the resulting suspension was aged statically in a closed vessel at 60 °C for two days, followed by

centrifugation and rinsing with distilled water. To remove P-123 from the samples, the resulting slurry was re-suspended twice in methanol and sonicated for 15 min. The material was dried in oven at 60°C for three days. Flake-like LDHs with nominal composition  $[\text{Zn}_2\text{Al}(\text{OH})_6] \cdot (\text{NO}_3^-) \cdot y\text{H}_2\text{O}$ ,  $[\text{Zn}_2\text{Al}_{0.95}\text{Eu}_{0.05}(\text{OH})_6] \cdot (\text{NO}_3^-) \cdot z\text{H}_2\text{O}$ , and  $[\text{Zn}_2\text{Al}_{0.95}\text{Eu}_{0.05}(\text{OH})_6] \cdot (\text{BTC}^{3-})_{0.33} \cdot w\text{H}_2\text{O}$ , dubbed, respectively, ZnAl-NO<sub>3</sub>, ZnAlEu5%-NO<sub>3</sub> and ZnAlEu5%-BTC, were synthesized with the same synthetic procedure, but without addition of P-123 and without heating. For ZnAl-NO<sub>3</sub> and ZnAlEu5%-NO<sub>3</sub> no BTC was added (see **Table S1**).

**Table S1. Synthetic conditions: concentration of Zn<sup>3+</sup>, Al<sup>3+</sup> and Eu<sup>3+</sup> for each of the samples**

| Sample               | [Zn <sup>2+</sup> ]<br>(mol.L <sup>-1</sup> ) | [Al <sup>3+</sup> ]<br>(mol.L <sup>-1</sup> ) | [Eu <sup>3+</sup> ]<br>(mol.L <sup>-1</sup> ) | BTC | P-123 |
|----------------------|-----------------------------------------------|-----------------------------------------------|-----------------------------------------------|-----|-------|
| ZnAl-NO <sub>3</sub> | 0.667                                         | 0.333                                         | -                                             | No  | No    |
| ZnAlEu5%-BTC         | 0.667                                         | 0.316                                         | 0.0166                                        | Yes | No    |
| ZnAlEu0%-BTC-P123    | 0.667                                         | 0.333                                         | -                                             | Yes | Yes   |
| ZnAlEu0.5%-BTC-P123  | 0.667                                         | 0.331                                         | 0.00166                                       | Yes | Yes   |
| ZnAlEu1%-BTC-P123    | 0.667                                         | 0.330                                         | 0.00333                                       | Yes | Yes   |
| ZnAlEu3%-BTC-P123    | 0.667                                         | 0.323                                         | 0.00999                                       | Yes | Yes   |
| ZnAlEu5%-BTC-P123    | 0.667                                         | 0.316                                         | 0.0166                                        | Yes | Yes   |
| ZnAlEu10%-BTC-P123   | 0.667                                         | 0.300                                         | 0.0333                                        | Yes | Yes   |
| ZnAlEu15%-BTC-P123   | 0.667                                         | 0.283                                         | 0.0500                                        | Yes | Yes   |

## S1.2. Characterization

The Zinc, Aluminum, Europium, Carbon, Hydrogen and Nitrogen content in the samples were determined by elemental analysis. A Perkin Elmer (Massachusetts, EUA) 2400 series ii elemental analyzer was used for CHN analysis. For the metal content, Inductively Coupled Plasma Optical Emission Spectrometry (ICP-OES) was performed with a Spectro Arcos (SPECTRO Analytical Instruments GmbH, Germany) optical spectrometer with radial view. Thermogravimetric analysis (TG) was performed on a TGA Q500 (TA Instruments). The temperature was ramped up from room temperature to 800 °C at a rate of 5 °C min<sup>-1</sup> using an air flow of 60 mL min<sup>-1</sup>. Powder X-ray diffraction (PXRD) was performed using a D8 Discover (Bruker) diffractometer in Bragg-Brentano geometry (Cu

K $\alpha$  radiation,  $\lambda = 1.5418 \text{ \AA}$ ). Data was recorded for the  $2\theta$  range from  $4^\circ$  to  $70^\circ$  in steps of  $0.05^\circ$  using an integration time of 1 s. Photoluminescence spectra were measured with a SPEX® Fluorolog® 3 (Horiba) equipped with a 450 W Xenon lamp as excitation source. X-ray absorption near edge structure (XANES) and extended X-ray absorption fine structure (EXAFS) measurements were performed at the XAFS2 beamline of the Brazilian Synchrotron Light Laboratory (LNLS, Campinas, Brazil)<sup>1</sup>. A double-crystal Si(111) monochromator was used. The powder samples were pressed into pellets and the absorption spectra were measured in the fluorescence mode for the Eu L<sup>III</sup>-edge (6.9769 keV). For the data analysis, an amplitude reduction factor  $S_0^2 = 0.95 \pm 0.11$  has been obtained from the fitting of the Eu L<sup>III</sup>-edge EXAFS data for the model compound Eu<sub>2</sub>O<sub>3</sub> (cubic phase<sup>2</sup>, coordination number = 6, see Ref. <sup>3</sup>). This value is in agreement with ab-initio calculations<sup>4</sup> using the FEFF8.4 code<sup>5</sup>. Chemical transferability has been assumed and this amplitude factor was used in the analysis of the LDH samples. The Demeter platform<sup>6</sup> has been used to model and fit the EXAFS data. Crystallographic information from layered Europium hydroxides<sup>7</sup>, assumed to be crystal analogs for the local environment of Eu<sup>3+</sup> in the LDHs, were used as input for the calculations implemented along with IFEFFIT.

## S2. Chemical composition

The elemental analysis data is shown in **Table S2**. Thermogravimetric analysis was employed for the quantification of BTC from the mass loss event around  $460^\circ\text{C}$  (**Figure S13**). The empirical formulae were derived assuming that, in line with the PXRD results, the general formula of the LDHs is valid for all samples with  $\text{Eu}^{3+}/(\text{Eu}^{3+} + \text{Al}^{3+}) \leq 15\%$ . Within the experimental uncertainties, the Zn<sup>2+</sup>, Al<sup>3+</sup> and + Eu<sup>3+</sup> content in the samples agree with the nominal quantities added for the synthesis. The M<sup>II</sup>/M<sup>III</sup> metal fraction ranged from 2.0 to 2.34, close to the nominal fraction  $\text{Zn}/(\text{Al}+\text{Eu}) = 2$ . The BTC stoichiometry in the BTC-containing LDHs ranges from 0.38 to 0.58, indicating that a mixture of BTC<sup>2+</sup> and BTC<sup>3+</sup> are present in these samples.

**Table S2. Experimental chemical composition of the samples.**

| Sample                   | Zn<br>(mmol/g) | Al<br>(mmol/g) | Eu<br>(mmol/g) | C <sup>B</sup><br>(mmol/g) | H<br>(mmol/g) | N<br>(mmol/g) | BTC*<br>(mmol/g) | Estimated formula <sup>A</sup>                                                                                                                                                                              |
|--------------------------|----------------|----------------|----------------|----------------------------|---------------|---------------|------------------|-------------------------------------------------------------------------------------------------------------------------------------------------------------------------------------------------------------|
| ZnAl-NO <sub>3</sub>     | 5.87(13)       | 2.73(1)        | -              | 0.28(6)                    | 24.5(2)       | 2.53(4)       | -                | [Zn <sub>2.15</sub> Al(OH) <sub>6.30</sub> ][(NO <sub>3</sub> <sup>-</sup> ) <sub>0.93</sub> (CO <sub>3</sub> <sup>2-</sup> ) <sub>0.10</sub> ].(1.5H <sub>2</sub> O)                                       |
| ZnAlEu5%-NO <sub>3</sub> | 5.25(29)       | 2.49(19)       | 0.118(7)       | 0.36(5)                    | 25.5(3)       | 2.39(5)       | -                | [Zn <sub>2.01</sub> Al <sub>0.955</sub> Eu <sub>0.045</sub> (OH) <sub>6.02</sub> ][(NO <sub>3</sub> <sup>-</sup> ) <sub>0.91</sub> (CO <sub>3</sub> <sup>2-</sup> ) <sub>0.14</sub> ].(1.9H <sub>2</sub> O) |
| ZnAlEu5%-BTC             | 4.48(3)        | 2.13(2)        | 0.105(10)      | 11.2(2)                    | 29.9(1)       | 0.06(1)       | 1.29             | [Zn <sub>2.00</sub> Al <sub>0.953</sub> Eu <sub>0.047</sub> (OH) <sub>6.00</sub> ][(NO <sub>3</sub> <sup>-</sup> ) <sub>0.03</sub> (BTC <sup>3-</sup> ) <sub>0.57</sub> ].(2.8H <sub>2</sub> O)             |
| ZnAl-BTC-P123            | 4.75(3)        | 2.33(1)        | -              | 11.7(2)                    | 32.3(3)       | 0.096(5)      | 0.69             | [Zn <sub>2.04</sub> Al(OH) <sub>6.08</sub> ][(NO <sub>3</sub> <sup>-</sup> ) <sub>0.04</sub> (BTC <sup>3-</sup> ) <sub>0.30</sub> ].(nH <sub>2</sub> O)                                                     |
| ZnAlEu0.5%-BTC-P123      | 4.36(5)        | 2.16(3)        | 0.0137(1)      | 13.2(1)                    | 33.0(3)       | 0.070(8)      | 0.95             | [Zn <sub>2.00</sub> Al <sub>0.994</sub> Eu <sub>0.006</sub> (OH) <sub>6.00</sub> ][(NO <sub>3</sub> <sup>-</sup> ) <sub>0.03</sub> (BTC <sup>3-</sup> ) <sub>0.44</sub> ].(nH <sub>2</sub> O)               |
| ZnAlEu1%-BTC-P123        | 4.58(21)       | 2.24(7)        | 0.0171(16)     | 12.7(1)                    | 33.1(3)       | 0.09(3)       | 0.90             | [Zn <sub>2.03</sub> Al <sub>0.992</sub> Eu <sub>0.008</sub> (OH) <sub>6.06</sub> ][(NO <sub>3</sub> <sup>-</sup> ) <sub>0.04</sub> (BTC <sup>3-</sup> ) <sub>0.40</sub> ].(nH <sub>2</sub> O)               |
| ZnAlEu3%-BTC-P123        | 4.71(10)       | 2.11(6)        | 0.0730(13)     | 13.2(1)                    | 32.7(1)       | 0.05(3)       | 0.95             | [Zn <sub>2.16</sub> Al <sub>0.967</sub> Eu <sub>0.033</sub> (OH) <sub>6.32</sub> ][(NO <sub>3</sub> <sup>-</sup> ) <sub>0.02</sub> (BTC <sup>3-</sup> ) <sub>0.44</sub> ].(nH <sub>2</sub> O)               |
| ZnAlEu5%-BTC-P123        | 4.51(3)        | 2.11(1)        | 0.117(1)       | 13.6(1)                    | 33.1(1)       | 0.09(2)       | 0.85             | [Zn <sub>2.02</sub> Al <sub>0.947</sub> Eu <sub>0.052</sub> (OH) <sub>6.04</sub> ][(NO <sub>3</sub> <sup>-</sup> ) <sub>0.04</sub> (BTC <sup>3-</sup> ) <sub>0.38</sub> ].(nH <sub>2</sub> O)               |
| ZnAlEu10%-BTC-P123       | 4.68(3)        | 1.98(1)        | 0.243(1)       | 14.3(1)                    | 29.2(1)       | 0.34(1)       | 1.29             | [Zn <sub>2.11</sub> Al <sub>0.891</sub> Eu <sub>0.109</sub> (OH) <sub>6.22</sub> ][(NO <sub>3</sub> <sup>-</sup> ) <sub>0.15</sub> (BTC <sup>3-</sup> ) <sub>0.58</sub> ].(nH <sub>2</sub> O)               |
| ZnAlEu15%-BTC-P123       | 3.64(29)       | 1.56(12)       | 0.199(27)      | 14.3(1)                    | 34.5(1)       | 0.09(1)       | 0.85             | [Zn <sub>2.34</sub> Al <sub>0.857</sub> Eu <sub>0.143</sub> (OH) <sub>6.68</sub> ][(NO <sub>3</sub> <sup>-</sup> ) <sub>0.05</sub> (BTC <sup>3-</sup> ) <sub>0.49</sub> ].(nH <sub>2</sub> O)               |

\* Calculated from TG. <sup>A</sup> For samples containing P123, the water content was not determined. <sup>B</sup> Both the Carbon content derived from CHN and TG agree for samples with no P123.

### S3. Structural characterization

**Table S3.** Crystallographic properties of the LDH samples.

| Sample                   | Peak position<br>$2\theta_{003}$ (°) | Peak width <sup>a</sup><br>$\delta(2\theta_{003})$ (°) | Basal spacing<br>$d_{(003)}$ (Å) | Scherer crystallite size <sup>b</sup><br>- (003) direction - (nm) | Average number<br>of stacked layers<br>in a crystallite <sup>c</sup> |
|--------------------------|--------------------------------------|--------------------------------------------------------|----------------------------------|-------------------------------------------------------------------|----------------------------------------------------------------------|
| ZnAl-NO <sub>3</sub>     | 9.88                                 | 0.92                                                   | 8.95                             | 9.2                                                               | 10                                                                   |
| ZnAlEu5%-NO <sub>3</sub> | 9.91                                 | 0.93                                                   | 8.92                             | 9.1                                                               | 10                                                                   |
| ZnAl-BTC                 | 6.71                                 | 1.11                                                   | 13.2                             | 7.6                                                               | 6                                                                    |
| ZnAlEu5%-BTC             | 6.69                                 | 1.62                                                   | 13.2                             | 5.2                                                               | 4                                                                    |
| ZnAl-BTC-P123            | 6.91                                 | 1.38                                                   | 12.8                             | 6.1                                                               | 5                                                                    |
| ZnAlEu0.5%-BTC-P123      | 6.85                                 | 1.47                                                   | 12.9                             | 5.7                                                               | 4                                                                    |
| ZnAlEu1%-BTC-P123        | 6.66                                 | 1.37                                                   | 13.3                             | 6.1                                                               | 5                                                                    |
| ZnAlEu3%-BTC-P123        | 6.75                                 | 1.81                                                   | 13.1                             | 4.6                                                               | 4                                                                    |
| ZnAlEu5%-BTC-P123        | 6.80                                 | 1.93                                                   | 13.0                             | 4.3                                                               | 3                                                                    |
| ZnAlEu10%-BTC-P123       | 6.95                                 | 1.97                                                   | 12.7                             | 4.2                                                               | 3                                                                    |
| ZnAlEu15%-BTC-P123       | 7.00                                 | 1.73                                                   | 12.6                             | 4.8                                                               | 4                                                                    |
| ZnAlEu20%-BTC-P123       | 7.15                                 | 1.73                                                   | 12.4                             | 4.8                                                               | 4                                                                    |

<sup>a</sup> Full width at half maximum. <sup>b</sup> Gaussian peak; Instrumental width: 0.14°. <sup>c</sup> Given by: (Crystallite size).(Basal spacing)<sup>-1</sup>.

The interplanar spacing in hexagonal lattices is given by:

$$\frac{1}{d_{(hkl)}^2} = \frac{4}{3} \left( \frac{h^2 + hk + k^2}{a^2} \right) + \frac{l^2}{N^2 c_0^2}$$

where N, the stacking number, is the number of stacked layers within the unit cell.

**Table S4.** Indexing of the Bragg reflections for Zn<sub>2</sub>Al-NO<sub>3</sub> with a rhombohedrally-centered hexagonal unit cell. Space group R3m; a = b = 3.064 Å and c = 3 c<sub>0</sub> = 26.856 Å.

| <i>Experimental</i> |                       |                                        | <i>Calculated</i>     |                                        |
|---------------------|-----------------------|----------------------------------------|-----------------------|----------------------------------------|
| Reflection<br>(hkl) | Position<br>$2\theta$ | Interplanar spacing<br>$d_{(hkl)}$ (Å) | Position<br>$2\theta$ | Interplanar spacing<br>$d_{(hkl)}$ (Å) |
| (003)               | 9.88                  | 8.952                                  | 9.88                  | 8.952                                  |
| (006)               | 19.86                 | 4.470                                  | 19.83                 | 4.476                                  |
| (009)               | 30.00                 | 2.979                                  | 29.94                 | 2.984                                  |
| (101)               | 33.87                 | 2.647                                  | 33.95                 | 2.640                                  |
| (012)               | 34.40                 | 2.607                                  | 34.46                 | 2.603                                  |
| (104)               | 36.4(3)               | 2.468(19)                              | 36.41                 | 2.468                                  |
| (015)               | 37.80                 | 2.380                                  | 37.82                 | 2.379                                  |
| (018)               | 43.58                 | 2.077                                  | 43.47                 | 2.082                                  |
| (1 0 10)            | 48.4(4)               | 1.881(15)                              | 48.21                 | 1.887                                  |
| (0 1 11)            | 51.1(3)               | 1.787(11)                              | 50.82                 | 1.797                                  |
| (0 1 13)            | 56.6(3)               | 1.626(8)                               | 56.45                 | 1.630                                  |
| (110)               | 60.43                 | 1.532                                  | 60.43                 | 1.532                                  |
| (113)               | 61.54                 | 1.507                                  | 61.40                 | 1.510                                  |

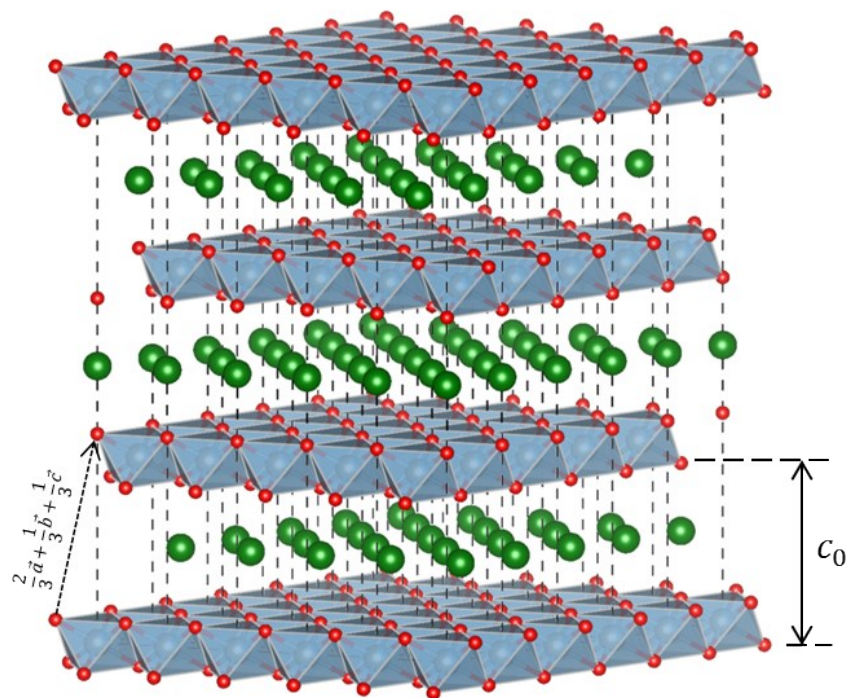

**Figure S1.** Stacking sequence of layered double hydroxides with polymorphism 3R<sub>1</sub>.

#### S4. Electron microscopy

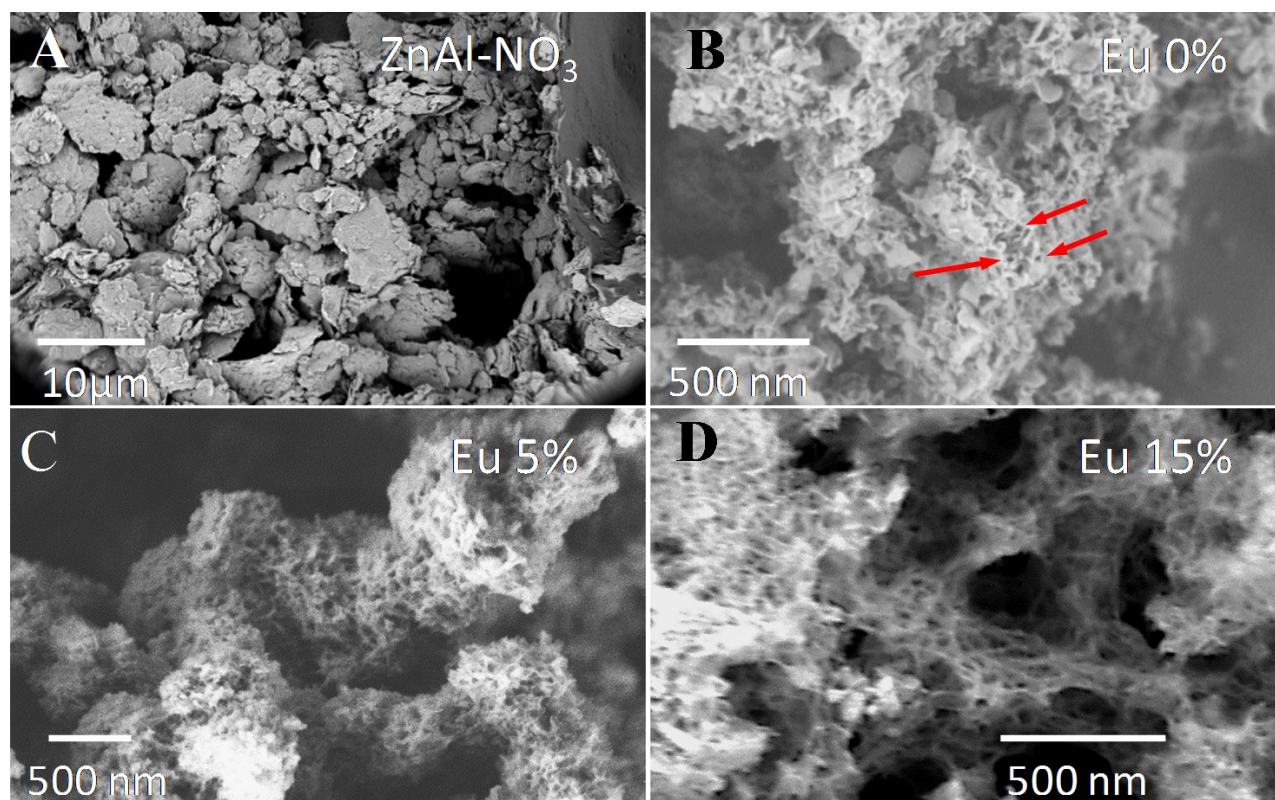

**Figure S2.** Scanning electron micrographs of (A) ZnAl-NO<sub>3</sub> and (B-D) ZnAlEuX%-BTC-P123 (X = 0, 5 and 15).

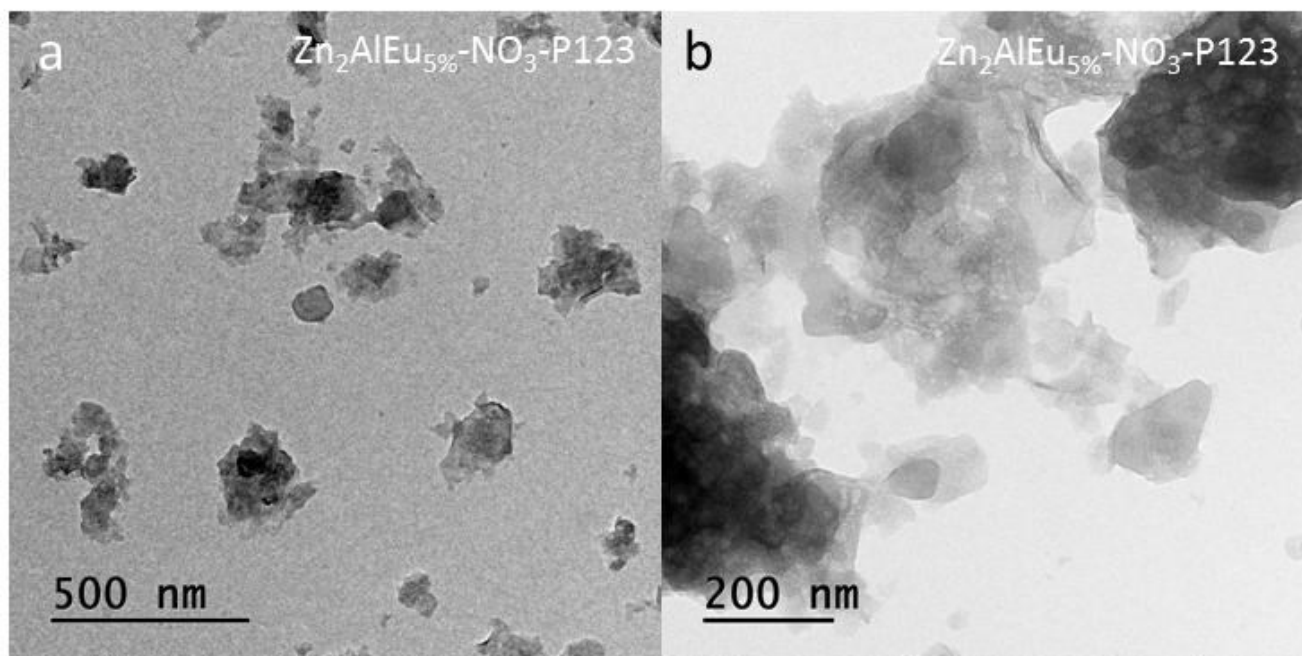

**Figure S3.** Scanning electron micrographs of the sample ZnAlEu5%-NO<sub>3</sub>-P123 showing that the nanotubular morphology is destroyed if BTC is not present in the samples.

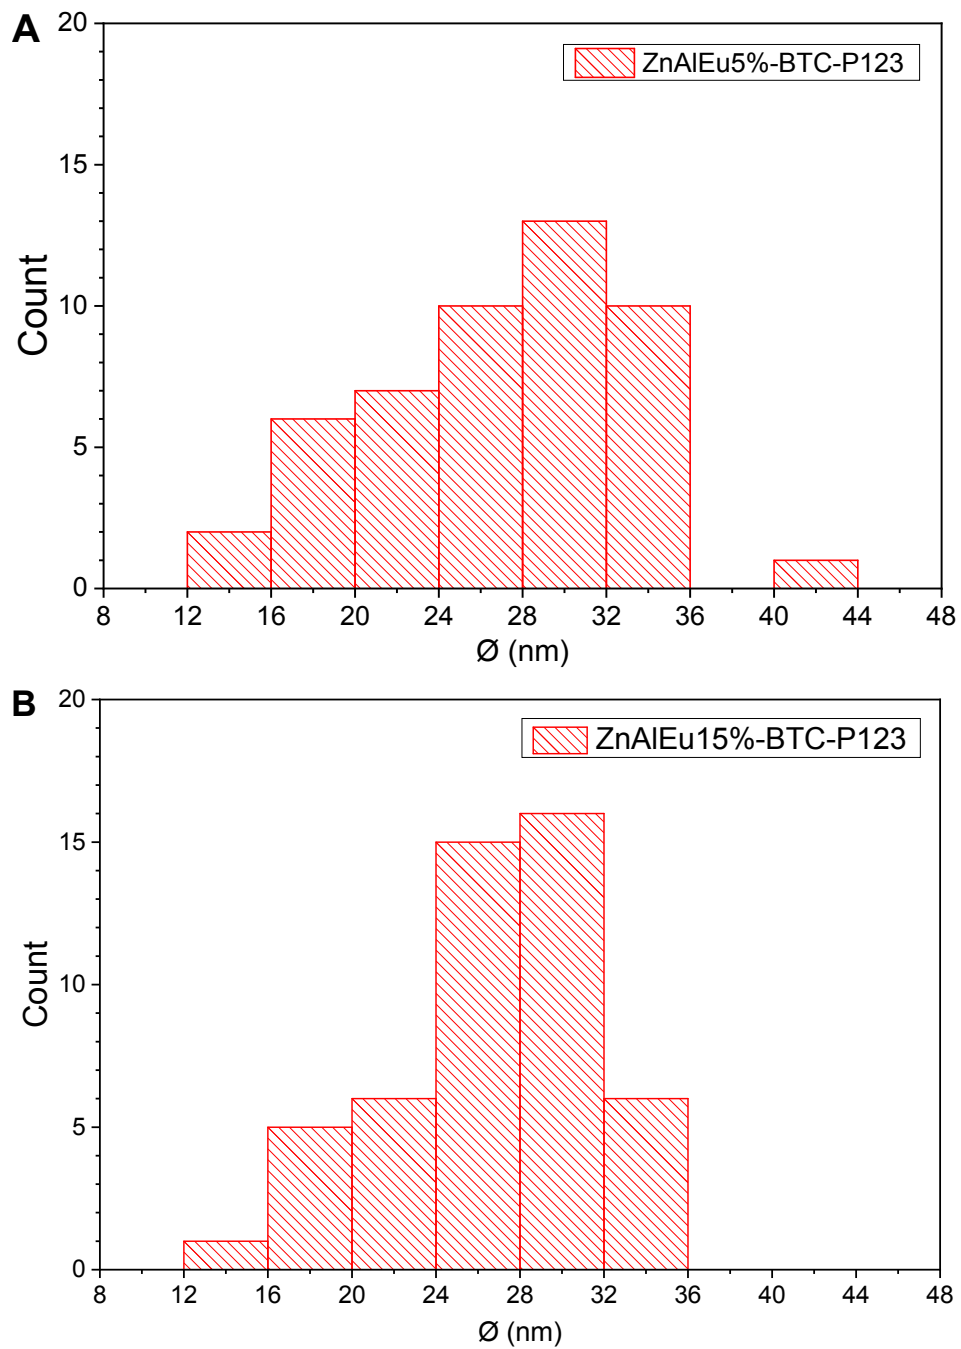

**Figure S4.** Histogram for the distribution of external diameter of the nanotubes in the samples (A) ZnAlEu5%-BTC-P123 and (B) ZnAlEu15%-BTC-P123. Analysis done on TEM micrographs using the software ImageJ.



### S5. Energy dispersive X-ray spectroscopy

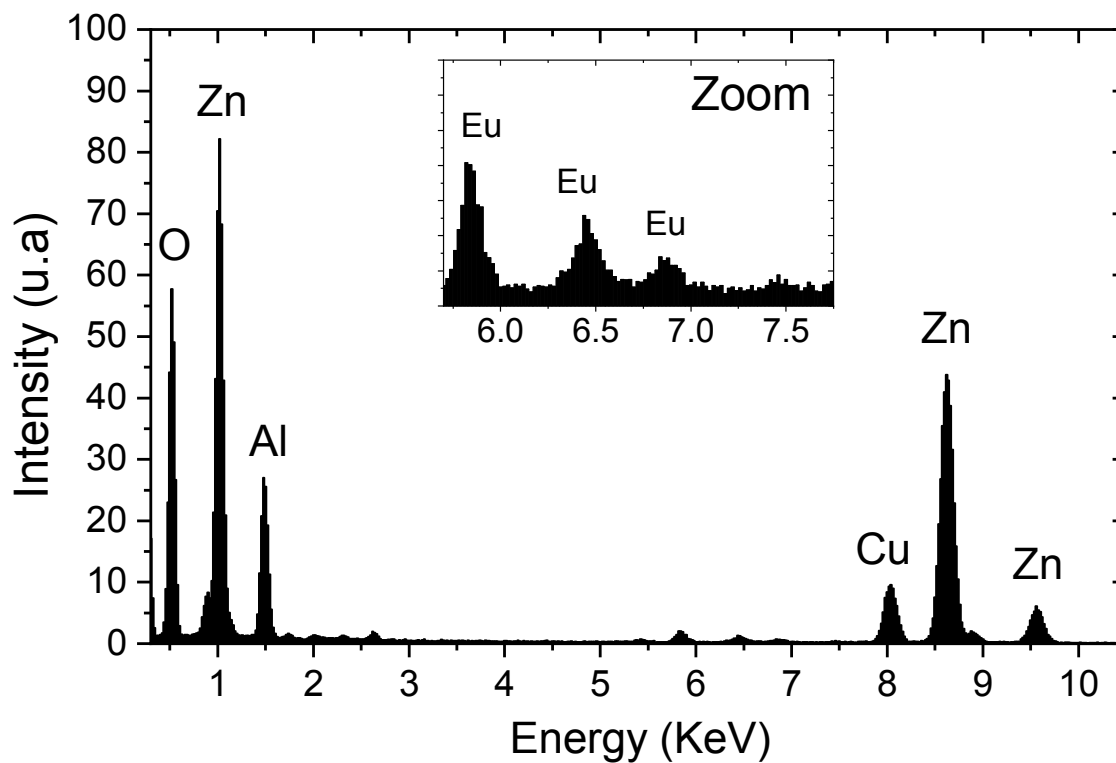

**Figure S5.** EDX spectrum of the region shown on Figure 2 F. The Cu peak arises from the Copper TEM grid.

## S6. X-ray Absorption Near Edge Spectroscopy (EXAFS)

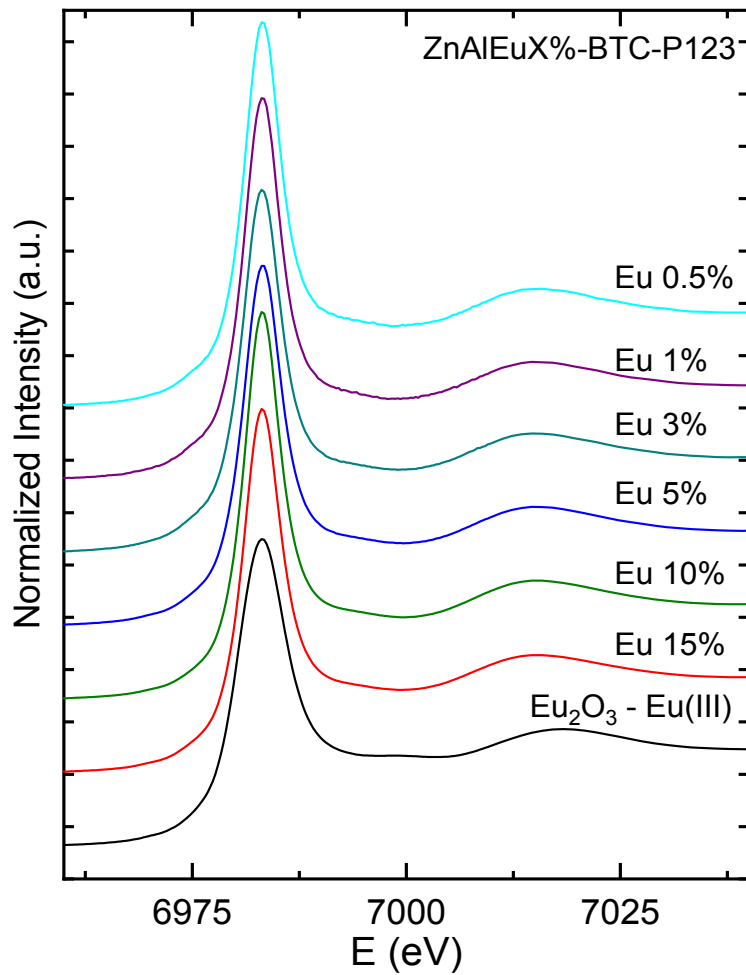

**Figure S6.** Normalized Eu L<sup>III</sup>-edge near edge spectra (XANES) for the samples ZnAlEuX%-BTC-P123 (X = 0.5, 1, 3, 5, 10 and 15) (color lines) and the reference compound Eu<sub>2</sub>O<sub>3</sub>, in which Europium is in the Eu(III) oxidation state.

## S7. Extended X-ray Absorption Fine Structure (EXAFS)

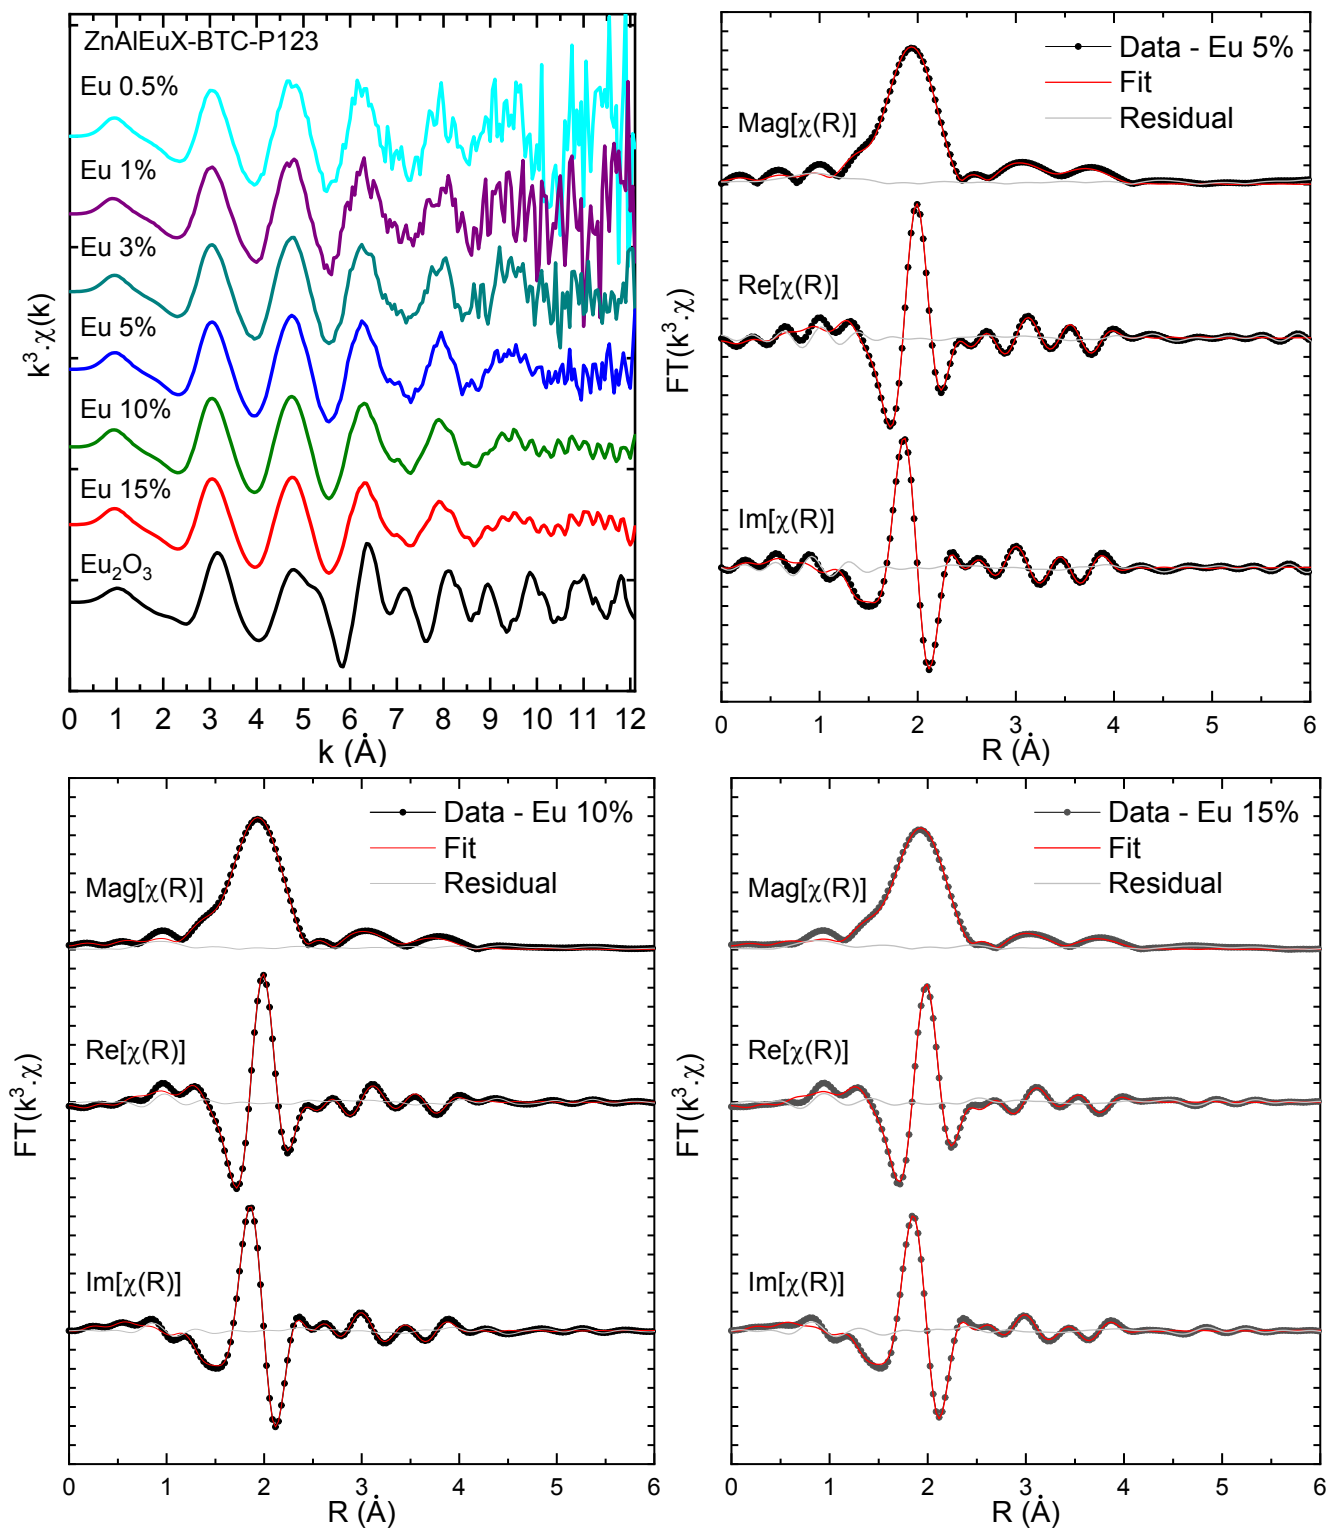

**Figure S7.** (A) Eu L<sup>III</sup>-edge XANES spectra for the samples ZnAlEuX%-BTC-P123 (X = 0.5, 1, 3, 5, 10 and 15) and the reference compound Eu<sub>2</sub>O<sub>3</sub>. Eu L<sup>III</sup>-edge Fourier transformed EXAFS spectra of (B) ZnAlEu5%-BTC-P123, (C) ZnAlEu10%-BTC-P123 and (D) ZnAlEu15%-BTC-P123.

**Table S5.** Comparison between the different models fitted to the Eu LIII-edge EXAFS data for the sample ZnAlEu15%-BTC-P123. These models consider different scatterers for the second and third coordination shells. The first shell comprises Oxygen scatterers. Although all these models produced low R-factors, some parameters have been evaluated to unphysical values.\*

| Path ( $R_0$ )            | Model 1 (O + O) |                                 |                                            | Model 2 (Zn + Zn) |                                 |                                            | Model 3 (Zn + O) |                                 |                                            |
|---------------------------|-----------------|---------------------------------|--------------------------------------------|-------------------|---------------------------------|--------------------------------------------|------------------|---------------------------------|--------------------------------------------|
|                           | N <sup>A</sup>  | R ( $\text{\AA}$ ) <sup>B</sup> | $\sigma^2$ ( $\text{\AA}^2$ ) <sup>C</sup> | N <sup>A</sup>    | R ( $\text{\AA}$ ) <sup>B</sup> | $\sigma^2$ ( $\text{\AA}^2$ ) <sup>C</sup> | N <sup>A</sup>   | R ( $\text{\AA}$ ) <sup>B</sup> | $\sigma^2$ ( $\text{\AA}^2$ ) <sup>C</sup> |
| Eu-O (2.4 $\text{\AA}$ )  | 7.8             | 2.419                           | 0.01176                                    | 7.1               | 2.415                           | 0.01105                                    | 7.9              | 2.416                           | 0.01199                                    |
| Eu-O (3.5 $\text{\AA}$ )  | 3.4             | 3.557                           | 0.01117                                    | -                 | -                               | -                                          | -                | -                               | -                                          |
| Eu-Zn (3.5 $\text{\AA}$ ) | -               | -                               | -                                          | 16.5              | 3.100                           | 0.04823                                    | 9.7              | 3.588                           | 0.02897                                    |
| Eu-O (4.0 $\text{\AA}$ )  | -2.9            | 4.186                           | 0.01000                                    | -                 | -                               | -                                          | -                | -                               | -                                          |
| Eu-Zn (4.0 $\text{\AA}$ ) | -               | -                               | -                                          | 5.9               | 4.022                           | 0.02538                                    | -17.5            | 4.086                           | 0.04236                                    |
| $\Delta E$ (eV)           | 3.6             |                                 |                                            | 3.2               |                                 |                                            | 3.1              |                                 |                                            |
| R-factor (%)              | 0.33%           |                                 |                                            | 0.76%             |                                 |                                            | 0.33%            |                                 |                                            |
| Chi-reduced               | 44              |                                 |                                            | 100               |                                 |                                            | 44               |                                 |                                            |

\* The k fitting range is 2.0-11  $\text{\AA}^{-1}$ . The R fitting range is 1.0-4.2  $\text{\AA}$ . <sup>A</sup> Coordination number. <sup>B</sup> Bond distance. <sup>C</sup> Debye-Waller factor.

## S8. Photoluminescence spectroscopy

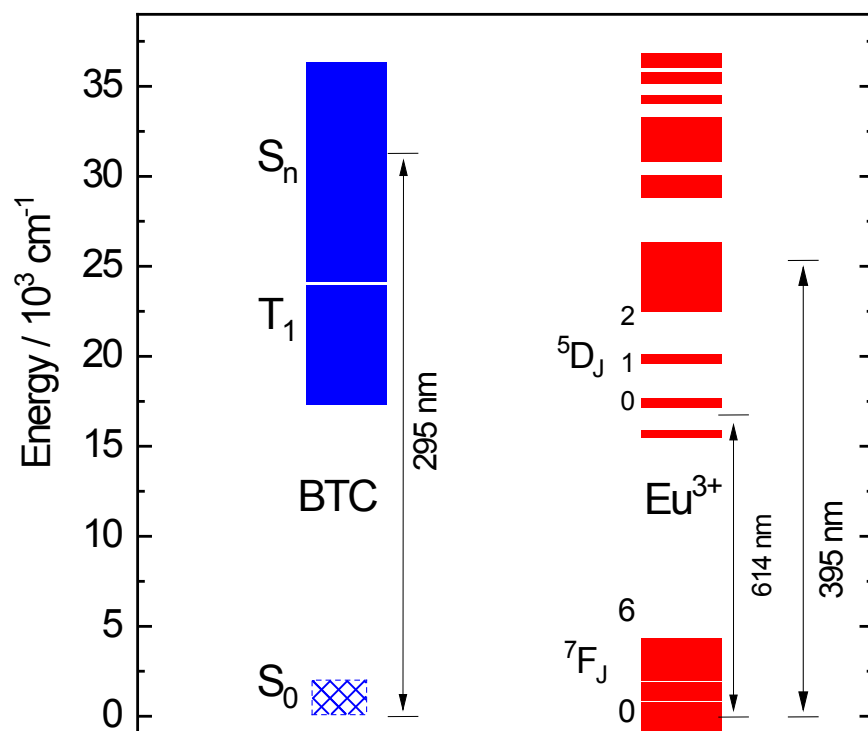

**Figure S8.** Energy diagram depicting the ligand-to-metal energy transfer from BTC to Eu<sup>3+</sup>. BTC is excited from the singlet state S<sub>0</sub> to an excited singlet state S<sub>n</sub>, following a nonradiative decay to the triplet T<sub>1</sub>. From T<sub>1</sub>, energy is transferred to the quasi-resonant 4f levels of Eu<sup>3+</sup>. The bandwidth of the S<sub>0</sub> level is unknown and is shown as hatch. Energy levels of BTC and Eu<sup>3+</sup> according to Refs. <sup>8</sup> and <sup>9</sup>, respectively.

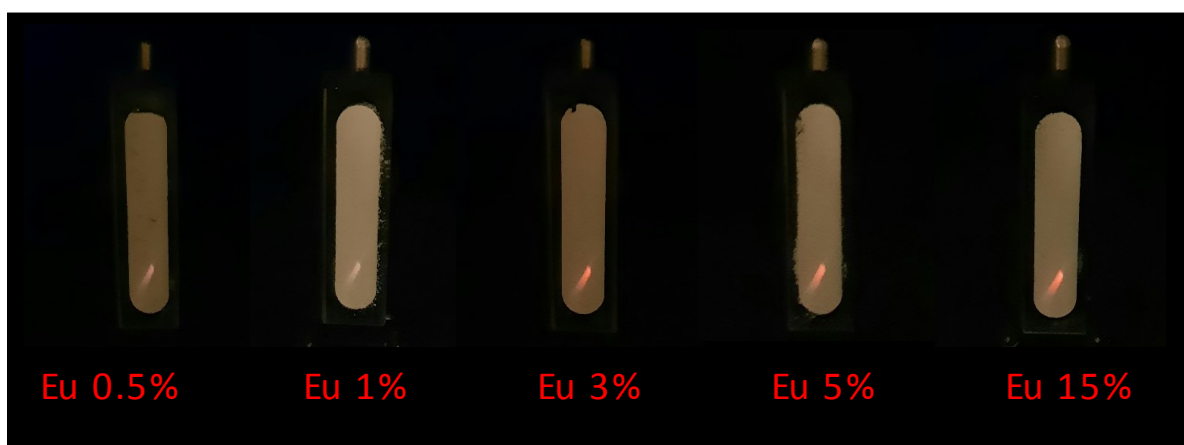

**Figure S9.** Picture showing the PL of ZnAlEuX-BTC-P123 (X = 0.5, 1, 3, 5 and 15%) under excitation on the BTC excitation band at 294 nm. A 455 nm low pass optical filter has been placed before the lens to remove the reflected excitation beam.

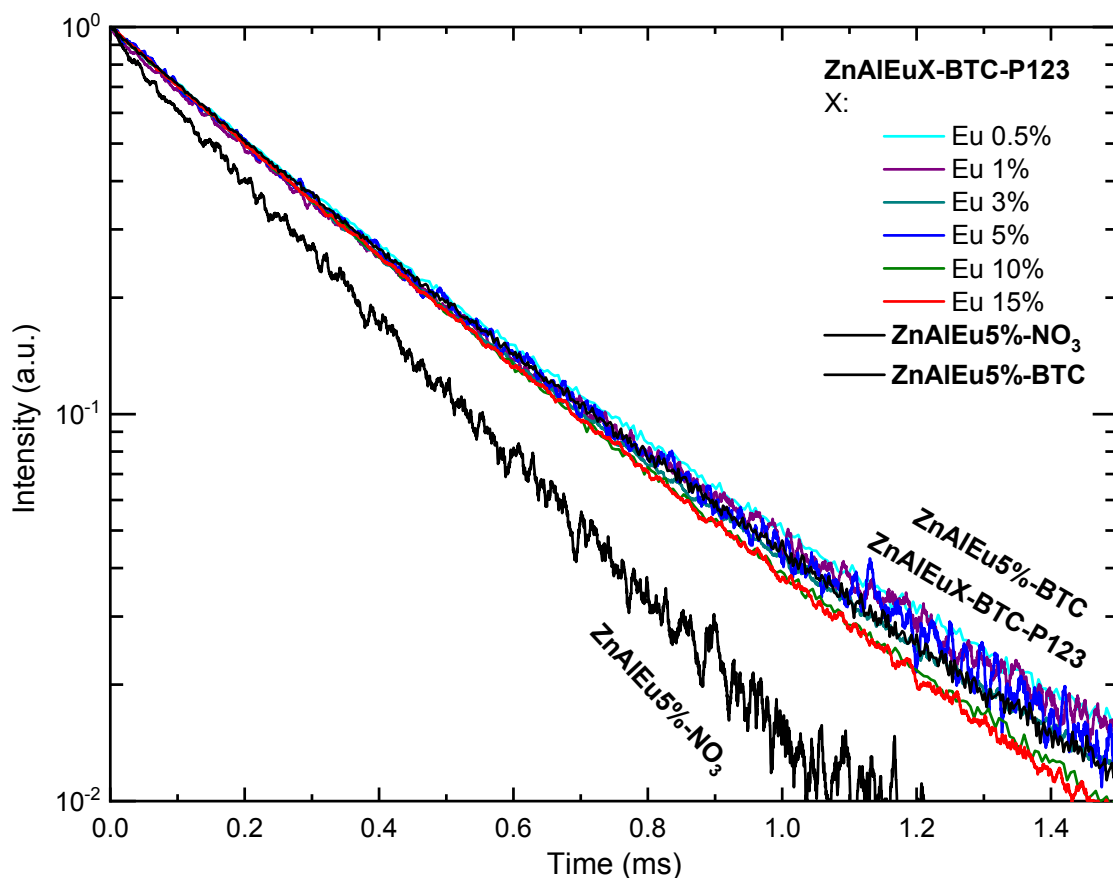

**Figure S10.** Luminescence decay curves monitored on the  $(Eu^{3+})^5D_0 \rightarrow ^7F_2$  emission band after excitation in the ligand band (295 nm) for samples containing BTC and direct excitation of the  $Eu^{3+}$  activators (394 nm) in the nitrate intercalated sample.

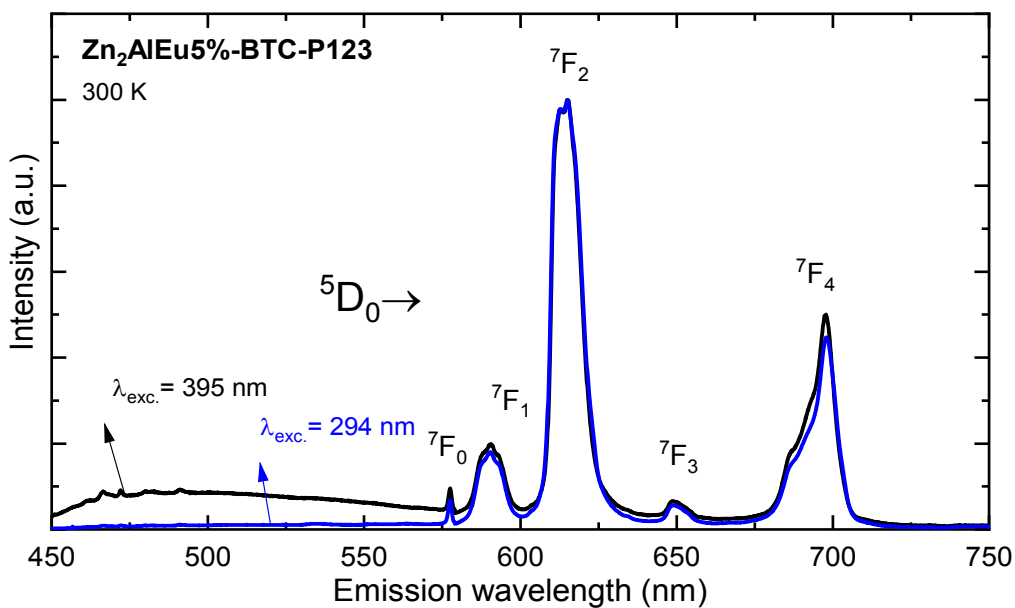

**Figure S11.** Emission spectra for the sample ZnAlEu5%-BTC-P123 after excitation in the ligand band at 294 nm and direct excitation of the  $(Eu^{3+})^7F_0 \rightarrow ^5L_6$  excitation band at 395 nm. The spectra are normalized by the maximum of the  $(Eu^{3+})^5D_0 \rightarrow ^7F_2$  emission.



## S9. Thermogravimetric curves

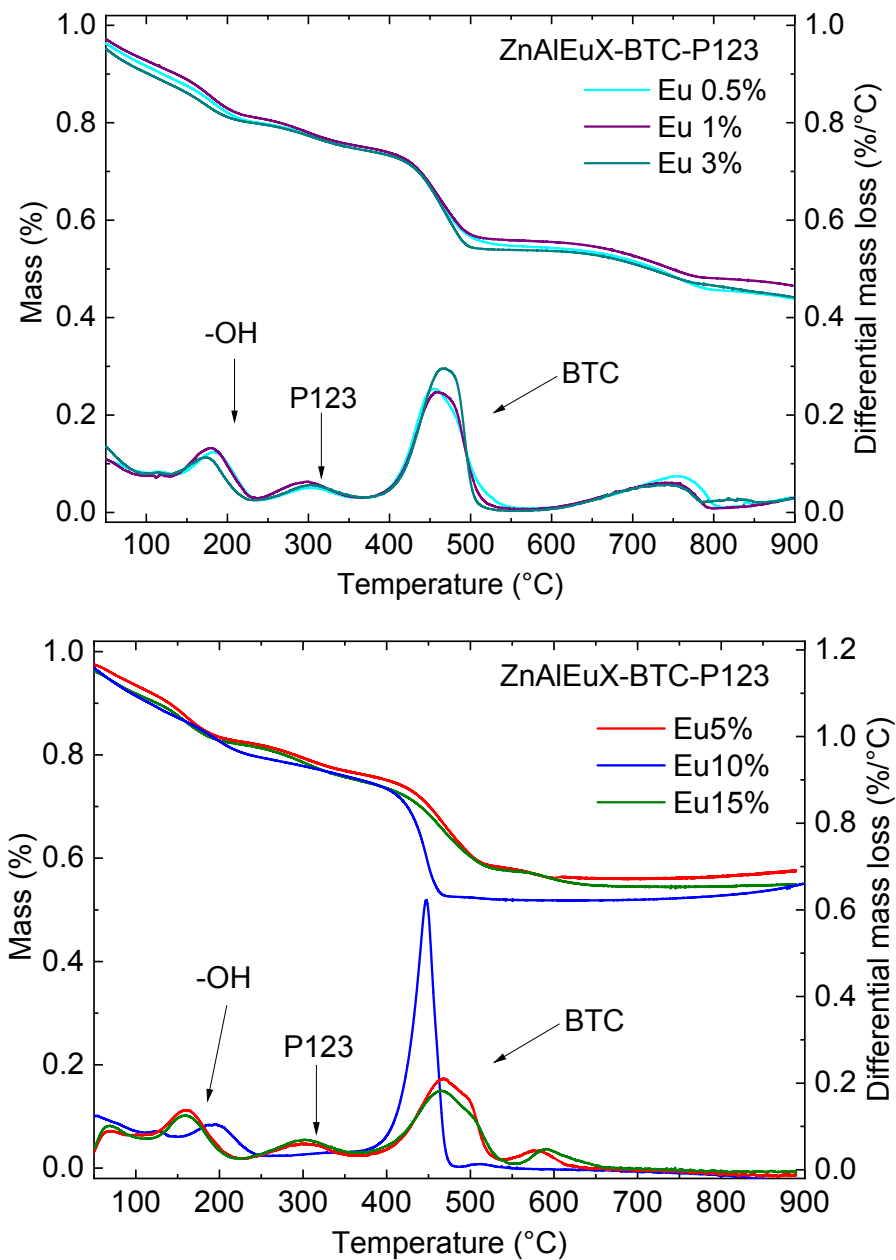

**Figure S12.** Thermogravimetric analyses used for the determination of the BTC content in the samples with P-123.



## References

- 1 S. J. A. Figueroa, J. C. Mauricio, J. Murari, D. B. Beniz, J. R. Piton, H. H. Slepicka, M. F. De Sousa, A. M. Espíndola and A. P. S. Levinsky, *J. Phys. Conf. Ser.*, 2016, **712**, 12022.
- 2 Z. K. Heiba, Y. Akin, W. Sigmund and Y. S. Hascicek, *J. Appl. Crystallogr.*, 2003, **36**, 1411–1416.
- 3 A. F. Morais, I. G. N. Silva, B. C. Lima, F. A. Garcia and D. Mustafa, *ACS Omega*, 2020, **5**, 23778–23785.
- 4 I. G. N. Silva, A. F. Morais, B. C. Lima, F. A. Garcia and D. Mustafa, *Appl. Clay Sci.*, 2020, **199**, 105861.
- 5 J. J. Rehr and R. C. Albers, *Rev. Mod. Phys.*, 2000, **72**, 621–654.
- 6 B. Ravel and M. Newville, *J. Synchrotron Radiat.*, 2005, **12**, 537–541.
- 7 F. Geng, H. Xin, Y. Matsushita, R. Ma, M. Tanaka, F. Izumi, N. Iyi and T. Sasaki, *Chem. - A Eur. J.*, 2008, **14**, 9255–9260.
- 8 E. R. Souza, I. G. N. Silva, E. E. S. Teotonio, M. C. F. C. Felinto and H. F. Brito, *J. Lumin.*, 2010, **130**, 283–291.
- 9 W. T. Carnall, P. R. Fields and K. Rajnak, *J. Chem. Phys.*, 1968, **49**, 4412–4423.
